# Supplementary material for: Brusatol inhibits HIF-1 signaling pathway and suppresses glucose uptake under hypoxic conditions in HCT116 cells
Source: PubMed Central journal article supplement (PMC5159874; doi:10.1038/srep39123), 2016-12-16

**Brusatol inhibits HIF-1 signaling pathway and suppresses glucose uptake under hypoxic conditions in HCT116 cells**

Yapeng Lu<sup>1</sup>, Bo Wang<sup>1</sup>, Qian Shi<sup>2</sup>, Xueting Wang<sup>1</sup>, Dang Wang<sup>1</sup>, Li Zhu<sup>1,\*</sup>

<sup>1</sup> Institute of Nautical Medicine, Nantong University, Nantong 226019, China

<sup>2</sup> Central laboratory, The first people's hospital of Huzhou, Huzhou 313000, China

# Supplementary information

## Supplementary figure 1

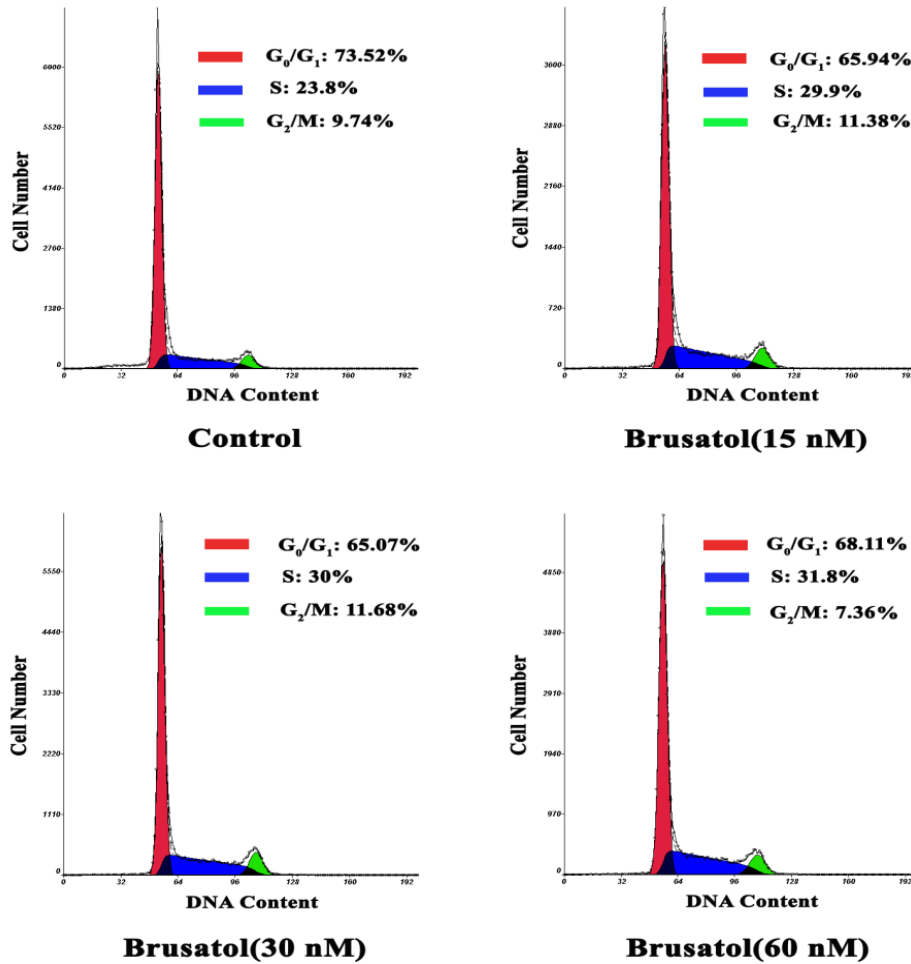

Supplementary figure 1: The effect of BRU on cell cycle in HCT116 cells. HCT116 cells were treated with BRU (15, 30, 60 nM) for 24 h, cell cycle distribution was detected by flow cytometry.

## Supplementary figure 2

A

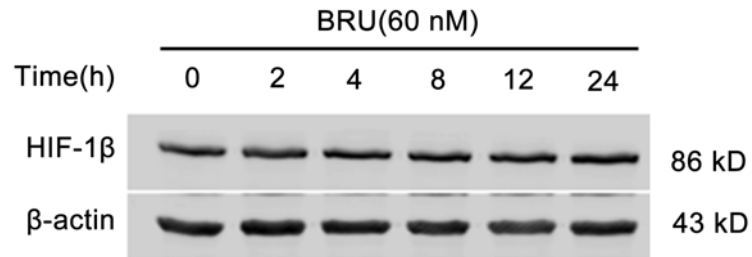

B

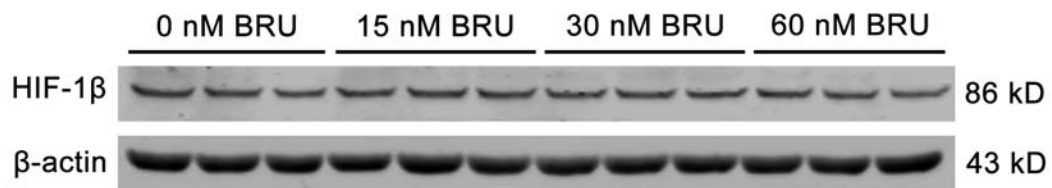

Supplementary figure 2: BRU does not affect the expression level of HIF-1β in HCT116 cells in hypoxic conditions. (A) HCT116 cells were treated with 60 nM BRU for different time under hypoxia (1% O<sub>2</sub>) and the quantity of HIF-1α protein was analyzed by Western blot. (B) HCT116 cells were treated with various concentrations of BRU for 4 h under hypoxia (1% O<sub>2</sub>) and the quantity of HIF-1α protein was analyzed by Western blot.

# The figures of full length blots

## Full-length gels and blots for figure 2

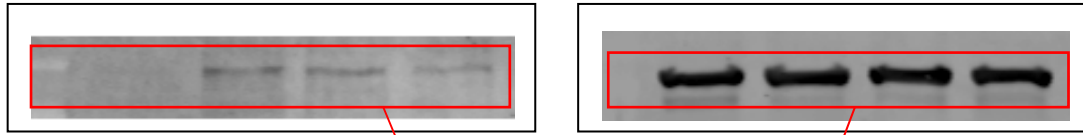

Fig 2A

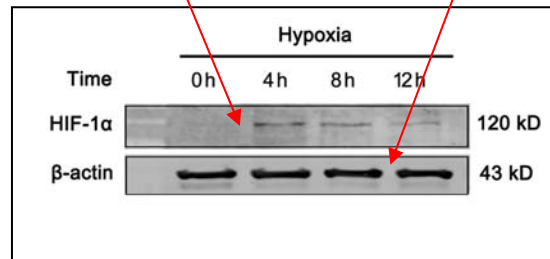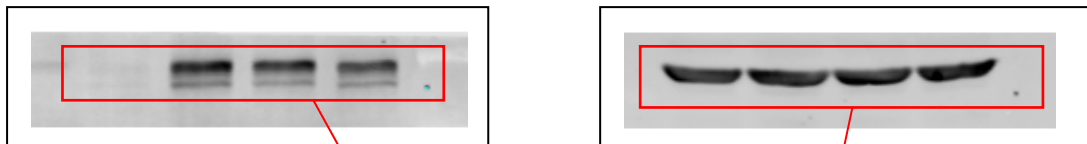

Fig 2C

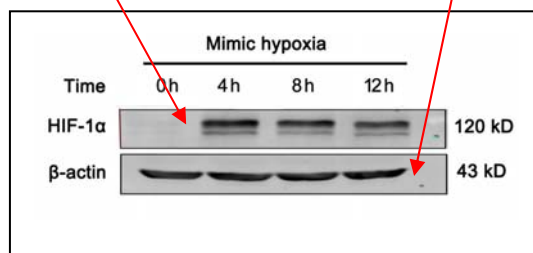

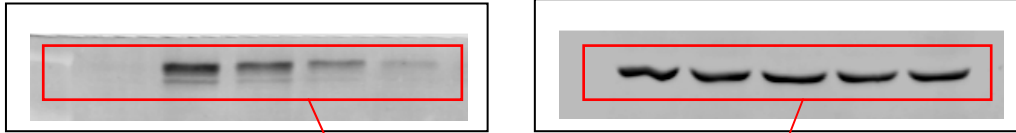

Fig 2E

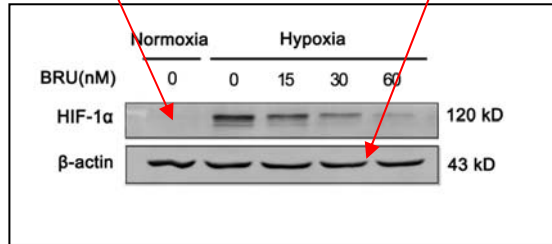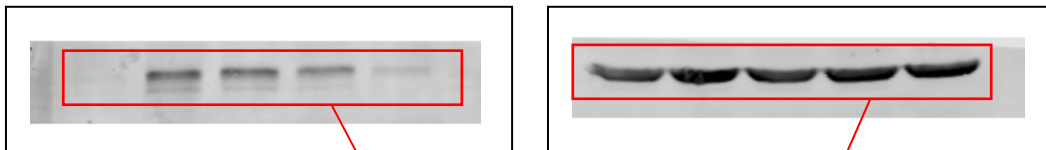

Fig 2G

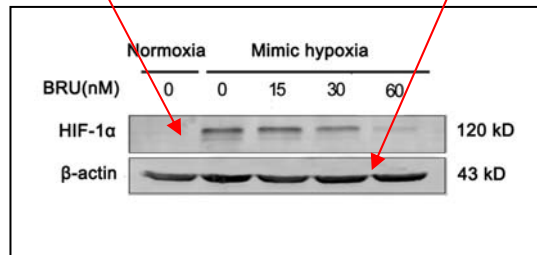

## Full-length gels and blots for figure 4

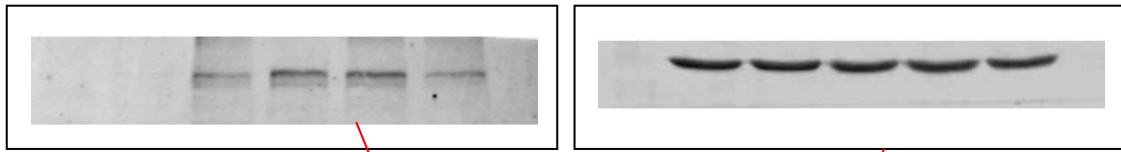

Fig 4A

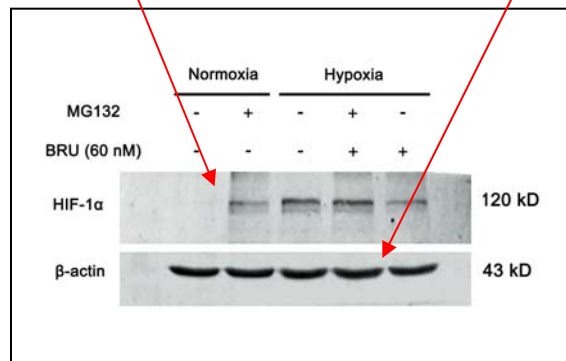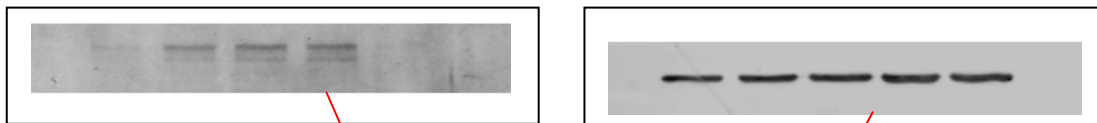

Fig 4B

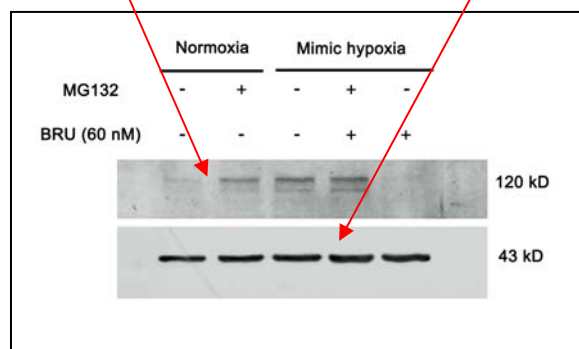

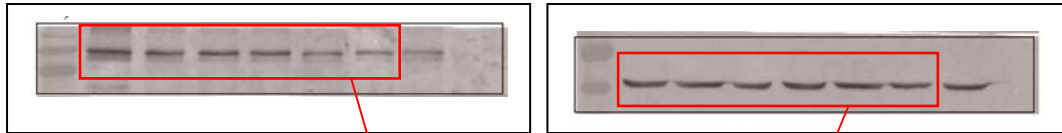

Fig 4C

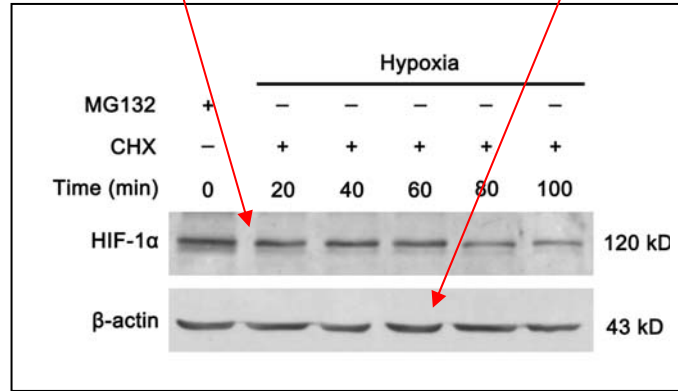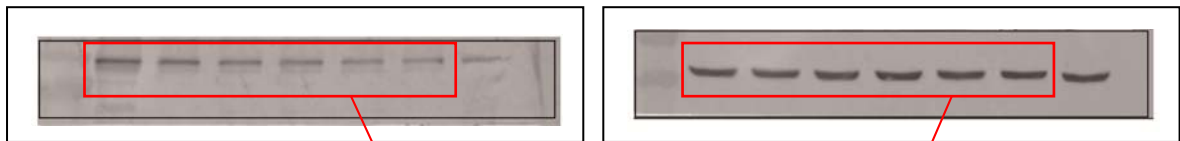

Fig 4D

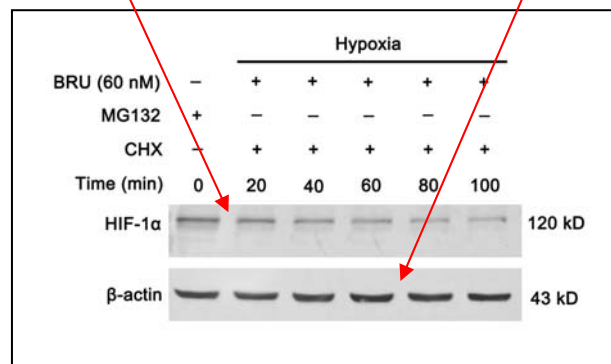

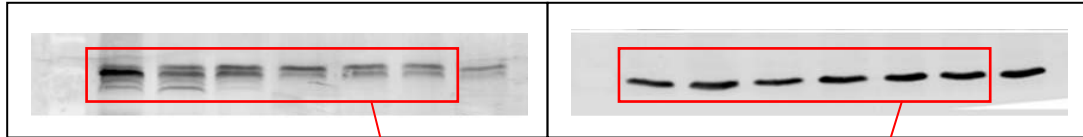

Fig 4E

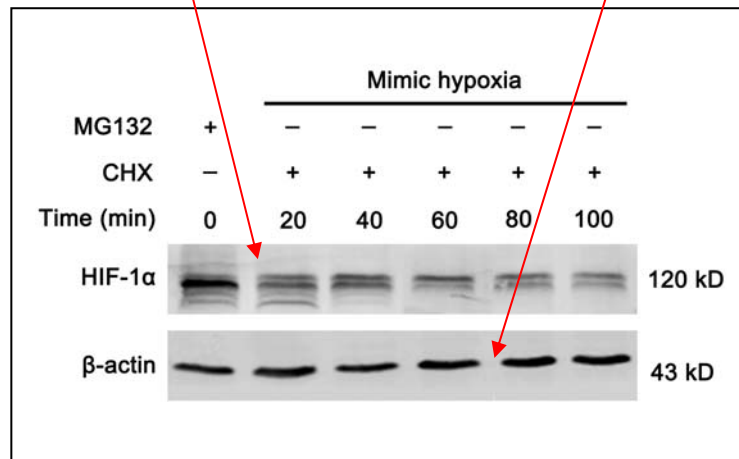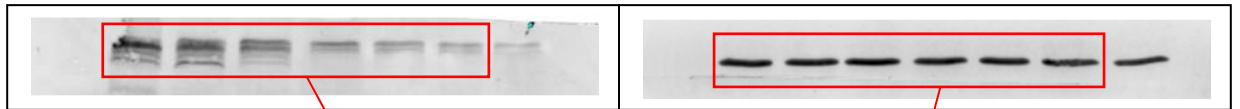

Fig 4E

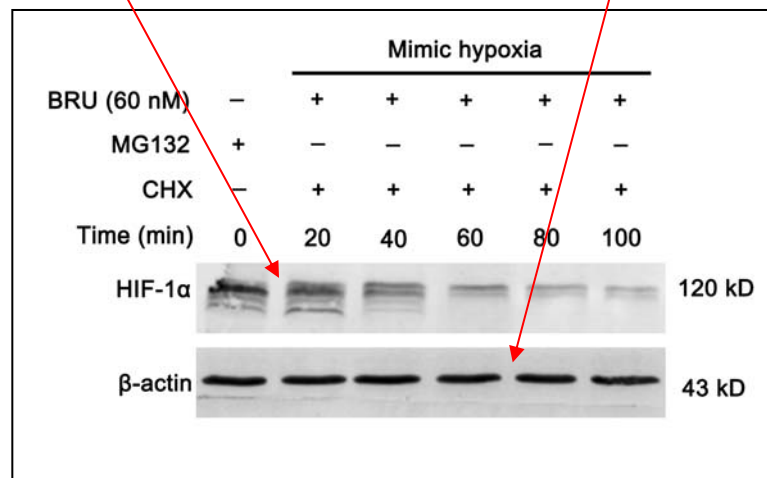



## Full-length gels and blots for figure 6

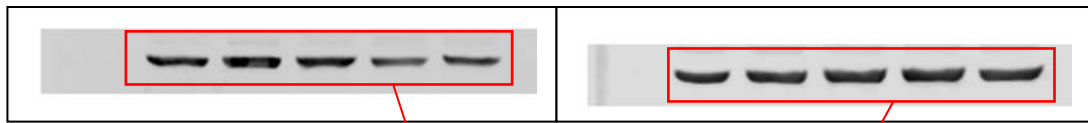

Fig 6C

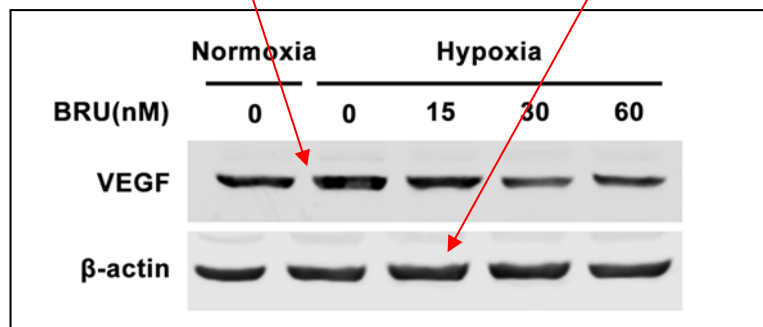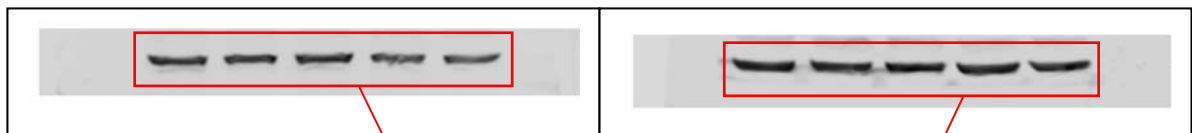

Fig 6D

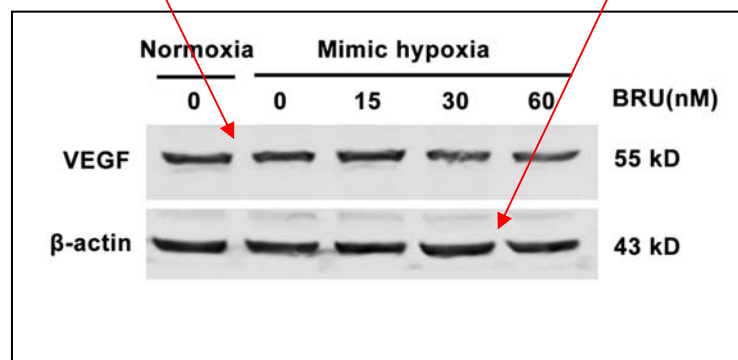

# Full-length gels and blots for figure 7

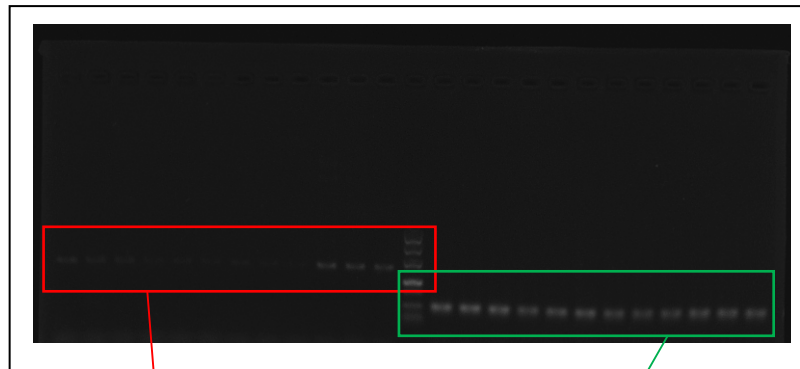

Fig 7A

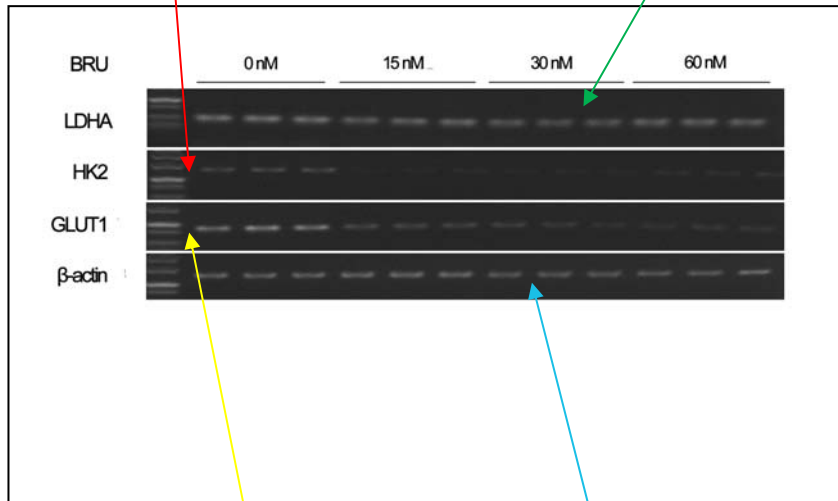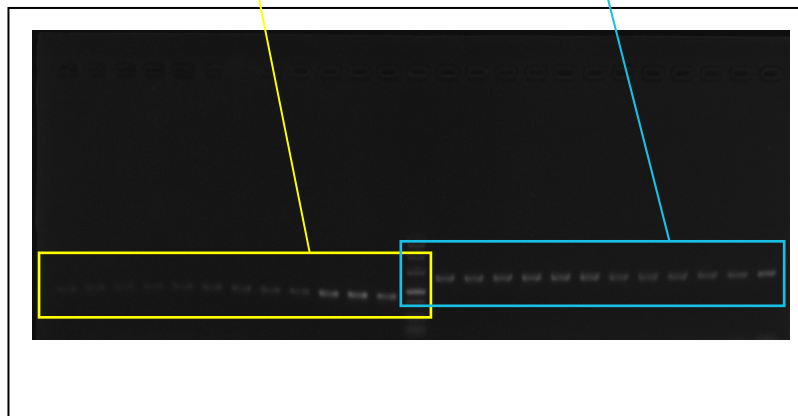

Supplement: srep39123-s1.pdf [file srep39123-s1.pdf]
